# Supplementary material for: Ionic strength effect on regulating the synthetic assembly of polyoxometalate clusters with slow magnetic relaxation behavior
Source: Royal Society of Chemistry journal article supplement (doi:10.1039/d0dt02409k), 2020-01-01
Supplement: d0dt02409k1.pdf [file d0dt02409k1.pdf]

## Supplemental Material

### Ionic strength effect on regulating the synthetic assemble of polyoxometalate clusters with slow magnetic relaxation behaviors

Jing Cai,<sup>\*a</sup> Run Ye,<sup>a</sup> Xinhao Liu,<sup>b</sup> Leilei Guo,<sup>a</sup> Xinrong Qiao<sup>\*a</sup>

<sup>a</sup>College of biology and pharmaceutical engineering, Xinyang Agriculture and Forestry University, Xinyang, Henan, 464000, China

<sup>b</sup>Department of central laboratory, Xinyang Agriculture and Forestry University, Xinyang, Henan, 464000, China

|                                                                                                                                                                                                                          |    |
|--------------------------------------------------------------------------------------------------------------------------------------------------------------------------------------------------------------------------|----|
| (1) Fig. S1 Powder X-ray diffraction patterns for compounds <b>1-3</b> .....                                                                                                                                             | 3  |
| (2) Fig. S2 Infrared spectra of compounds <b>1-3</b> .....                                                                                                                                                               | 4  |
| (4) Fig. S3 TG analysis of compounds <b>1-3</b> .....                                                                                                                                                                    | 5  |
| (7) Table S1. Crystallographic Data for Compounds <b>1-3</b> .....                                                                                                                                                       | 7  |
| (10) Table S2 Selected bond distances of <b>1</b> .....                                                                                                                                                                  | 8  |
| (11) Table S3 Selected bond distances of <b>2</b> .....                                                                                                                                                                  | 9  |
| (12) Table S4 Selected bond distances of <b>3</b> .....                                                                                                                                                                  | 10 |
| (13) Table S5 The valence state results of W atoms from {W <sub>3</sub> O <sub>11</sub> } unit, Sb, Dy and Ni for compound <b>1</b> based on BVS.....                                                                    | 11 |
| (14) Table S6 The valence state results of W atoms from {W <sub>3</sub> O <sub>11</sub> } unit, Sb and Dy for compound <b>2</b> based on BVS.....                                                                        | 13 |
| (15) Fig. S4 The XPS spectra of W atoms for compounds <b>1</b> and <b>2</b> .....                                                                                                                                        | 15 |
| (16) Fig. S5 The XPS spectra of Sb atoms for compounds <b>1</b> and <b>2</b> .....                                                                                                                                       | 16 |
| (17) Fig. S6 Plots of 1/ $\chi_m$ vs. T to a Curie-Weiss law for compounds <b>1</b> and <b>2</b> in the range of 2-300 K.....                                                                                            | 17 |
| (18) Fig. S7. Temperature dependence of in-phase ( $\chi'$ ) (a), (c) and out-of-phase ( $\chi''$ ) (b), (d) of ac susceptibility signals at different frequencies under a zero dc field for <b>1</b> and <b>2</b> ..... | 17 |

|                                                                                                                                              |    |
|----------------------------------------------------------------------------------------------------------------------------------------------|----|
| (19) Fig. S8 Field dependence of in-phase ( $\chi'$ ) of ac susceptibility signals at 2 K for <b>1</b> (a) and <b>2</b> (b).....             | 18 |
| (20) Fig. S9 Temperature dependence of in-phase ( $\chi'$ ) of ac susceptibility signals at 2 K for <b>1</b> (a) and <b>2</b> (b).....       | 18 |
| (21) Fig. S10 Cole-Cole diagrams of <b>1</b> (a) and <b>2</b> (b) with the solid lines represent the best fits to the experimental data..... | 19 |
| (22) Fig. S11 Plots of $\ln(\tau)$ versus $T^{-1}$ for <b>2</b> fitted by the generalized Debye model for a one-relaxation process.....      | 20 |
| (23) Table S7 Best fitted parameters of the Cole-Cole plots for <b>2</b> .....                                                               | 20 |
| (24) Table S8 The energy barriers for this work and the previously reported Dy-containing POM-based SMMs.....                                | 21 |
| (25) References.....                                                                                                                         | 22 |

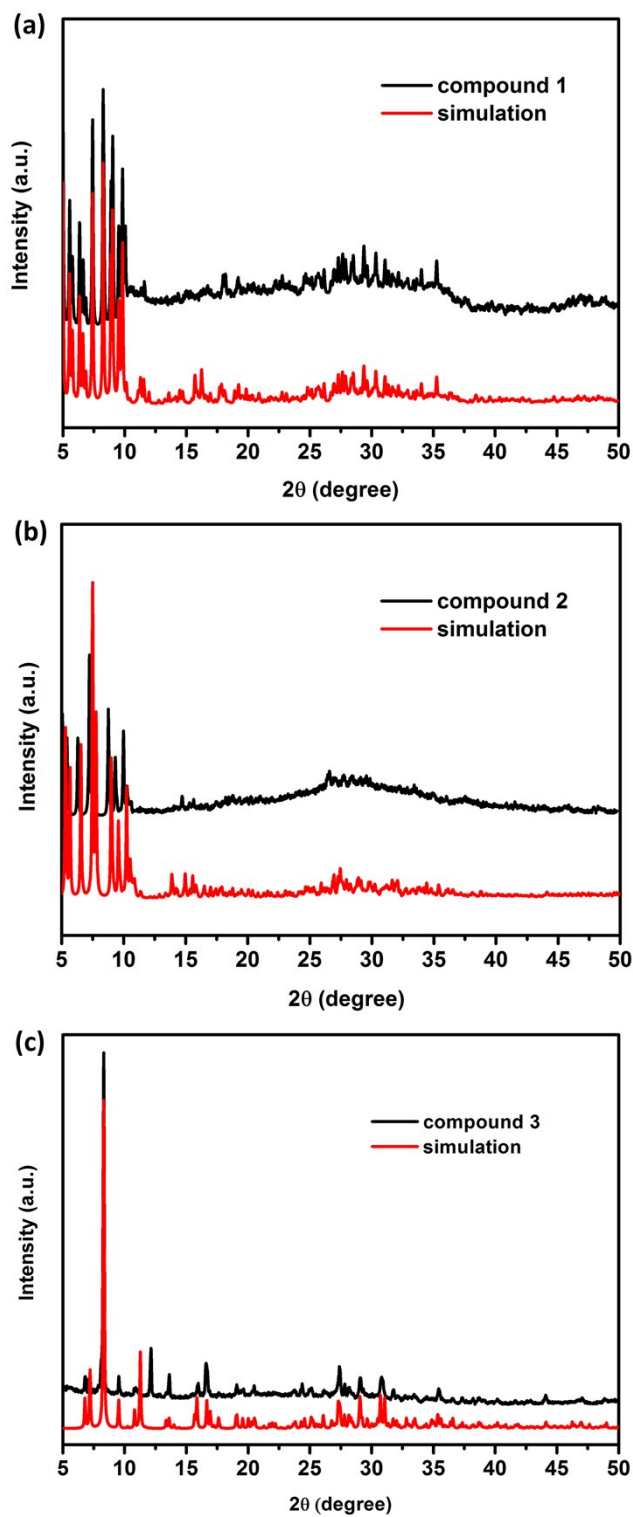

**Fig. S1.** Powder X-ray diffraction patterns for compounds **1-3**.

The PXRD patterns of compounds **1-3** were investigated, and the most peak positions of simulated were in good agreement with the experimental patterns, respectively, indicating the good phase purity of the products.

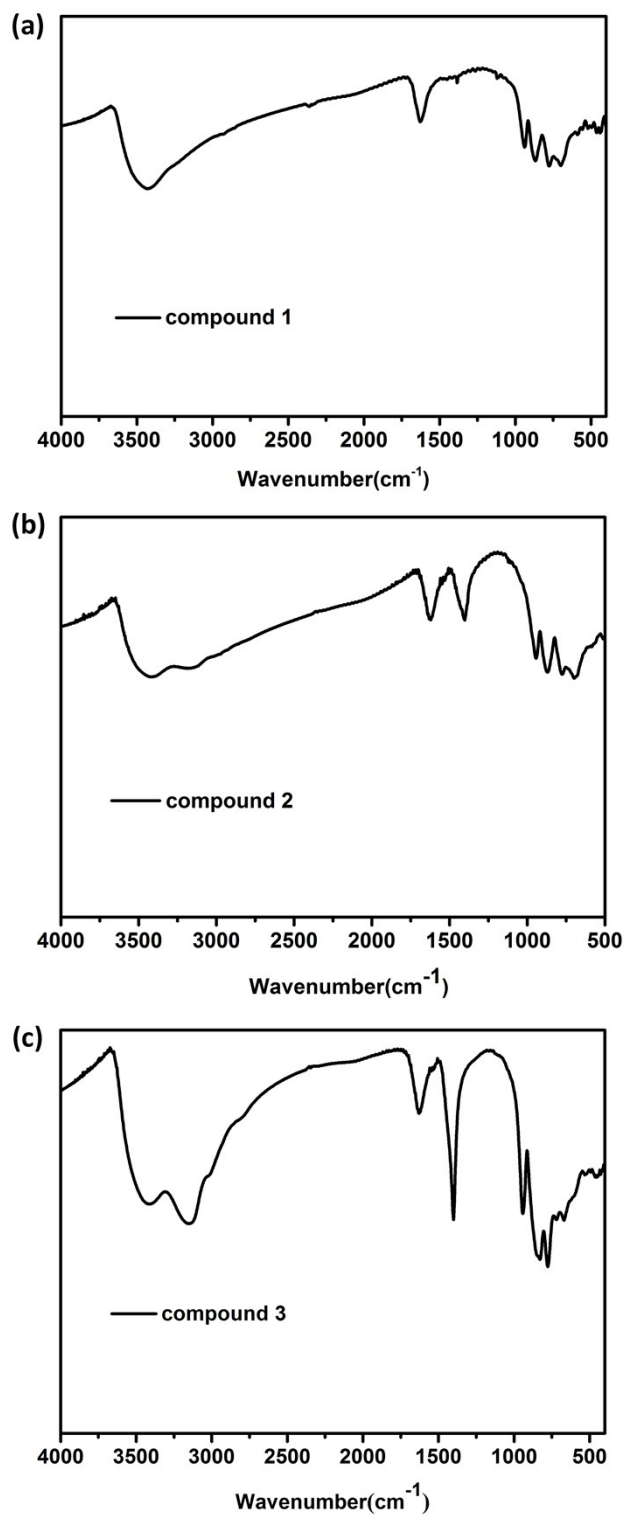

**Fig. S2.** Infrared spectra of compounds **1-3**.

The IR spectra of **1-3** were measured in the range of 4000 – 400  $\text{cm}^{-1}$ . The broad band around 3420  $\text{cm}^{-1}$  can be deemed as characteristic peaks of the lattice and coordinated water molecules, while **2** and **3** appear two peaks between 3100 and 3420  $\text{cm}^{-1}$  that are probably associated with the stretching vibration of N-H except for the

stretching vibration of O-H. Peaks at about  $1630\text{ cm}^{-1}$  may be ascribed to the in-plane bending vibration of water molecules. The feature peaks of  $945, 870, 775, 701, 506, 445\text{ cm}^{-1}$  for **1**,  $947, 873, 773, 698, 512, 461\text{ cm}^{-1}$  for **2** and  $941, 828, 777, 669, 433\text{ cm}^{-1}$  for **3** in the fingerprint region can be regarded as the stretching vibration of  $\text{W-O}_d$ ,  $\text{W-O}_b\text{-W}$ ,  $\text{W-O}_c\text{-W}$ , and  $\text{Sb-O}_a$  in polyoxoanion framework.

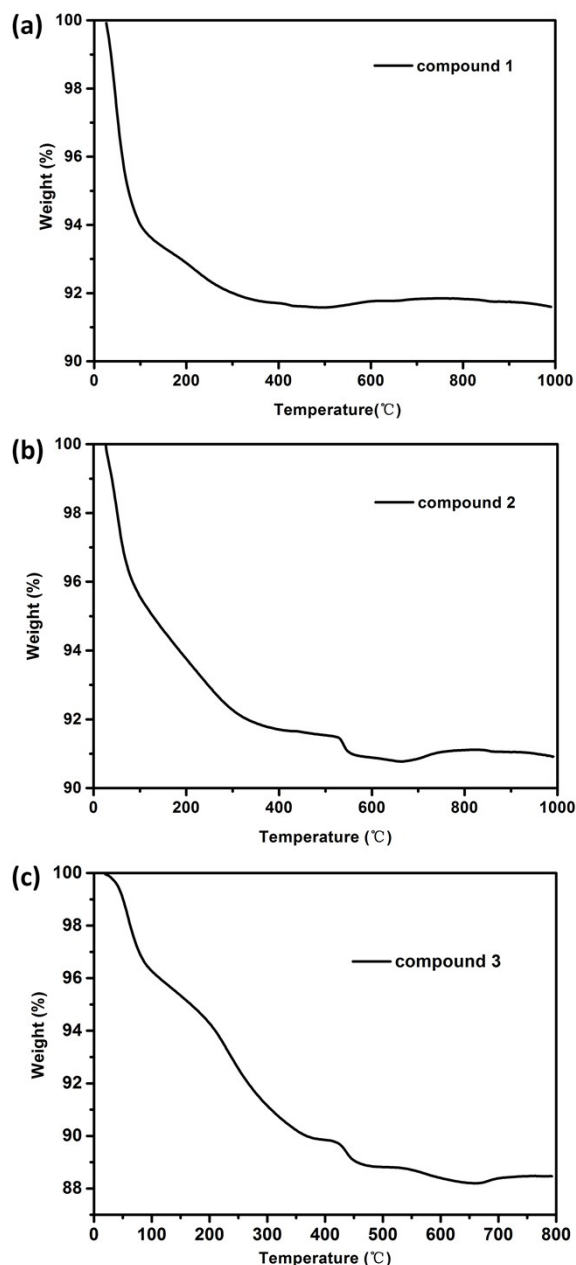

**Fig. S3.** TG analysis of compounds **1-3** .

The TG curves of compounds **1-3** were shown in Figure S3, the weight loss of 6.3% from 20 to 200 °C for **1**, 8.5% from 20 to 500 °C for **2** and 9.2% from 20 to 400 °C

for **3** can be ascribed to the removal of the guest and coordinated water molecules. Among them, the weight loss of **1** and **2** are less than their theoretical values 9.7% and 10.6% possibly because that **1** and **2** are easy efflorescence to lose part of crystalline water molecules. The slow mass loss in the temperature range of 200-500 °C, 500-660 °C and 400-650 °C for **1-3** correspond to the slow decomposition of compounds. The unusual increase of TGA curves after 500, 660 and 650 °C for **1-3** can be attributed to the valence conversion from Sb<sup>III</sup> to Sb<sup>V</sup>. The final residue of **1** is 91.6%, which agrees with calculated value 90.0% based on Dy<sub>2</sub>O<sub>3</sub>, NiO, Sb<sub>2</sub>O<sub>5</sub>, Na<sub>2</sub>O and WO<sub>3</sub>. For **2**, the final residue is 91.1%, which agrees with calculated value 88.8% based on Dy<sub>2</sub>O<sub>3</sub>, Sb<sub>2</sub>O<sub>5</sub>, Na<sub>2</sub>O and WO<sub>3</sub>. For **3**, the final residue is 88.5%, which agrees with calculated value 87.2% based on NiO, Sb<sub>2</sub>O<sub>5</sub>, Na<sub>2</sub>O and WO<sub>3</sub>.

**Table S1.** Crystallographic Data for Compounds **1-3**

| Compound                                  | <b>1</b>                                                                          | <b>2</b>                                                                       | <b>3</b>                                         |
|-------------------------------------------|-----------------------------------------------------------------------------------|--------------------------------------------------------------------------------|--------------------------------------------------|
| Formula                                   | H <sub>104</sub> Na <sub>10</sub> K <sub>10</sub> Sb <sub>3</sub> Dy <sub>3</sub> | H <sub>134</sub> N <sub>5</sub> Na <sub>8</sub> K <sub>4</sub> Sb <sub>4</sub> | H <sub>96</sub> N <sub>9</sub> NaSb <sub>2</sub> |
|                                           | NiW <sub>30</sub> O <sub>162</sub>                                                | Dy <sub>3</sub> W <sub>30</sub> O <sub>167</sub>                               | Ni <sub>2</sub> W <sub>20</sub> O <sub>100</sub> |
| <i>Mr</i>                                 | 9744.28                                                                           | 9707.05                                                                        | 5883.46                                          |
| Crystal system                            | triclinic                                                                         | monoclinic                                                                     | monoclinic                                       |
| Space group                               | <i>P</i> -1                                                                       | <i>C</i> 2/ <i>c</i>                                                           | <i>C</i> 2/ <i>m</i>                             |
| <i>a</i> /Å                               | 18.2445(6)                                                                        | 35.159(3)                                                                      | 17.8033(14)                                      |
| <i>b</i> /Å                               | 19.9956(7)                                                                        | 18.5597(7)                                                                     | 18.5672(16)                                      |
| <i>c</i> /Å                               | 24.4742(6)                                                                        | 48.357(3)                                                                      | 14.1660(12)                                      |
| <i>α</i> /°                               | 93.078(2)                                                                         | 90                                                                             | 90                                               |
| <i>β</i> /°                               | 99.426(2)                                                                         | 114.193(9)                                                                     | 113.239(9)                                       |
| <i>γ</i> /°                               | 116.645(3)                                                                        | 90                                                                             | 90                                               |
| <i>V</i> /Å <sup>3</sup>                  | 7790.2(5)                                                                         | 28784(4)                                                                       | 4302.8(7)                                        |
| <i>Z</i>                                  | 2                                                                                 | 8                                                                              | 1                                                |
| T/K                                       | 186                                                                               | 191                                                                            | 178                                              |
| $\rho_{\text{calc}}/\text{g}/\text{cm}^3$ | 3.829                                                                             | 4.168                                                                          | 4.203                                            |
| $\mu/\text{mm}^{-1}$                      | 24.339                                                                            | 26.985                                                                         | 27.761                                           |
| F(000)                                    | 7742.0                                                                            | 31039.0                                                                        | 4684.0                                           |
| 2 $\theta$ /°                             | 5.858-50                                                                          | 5.706-50                                                                       | 6.156-49.996                                     |
| Observed reflections                      | 18376                                                                             | 25278                                                                          | 3883                                             |
| Data/parameters                           | 27383/1784                                                                        | 25278/1789                                                                     | 3883/270                                         |
| GOF                                       | 1.002                                                                             | 1.086                                                                          | 1.088                                            |
| $R_1[I > 2\sigma(I)]$                     | 0.0832                                                                            | 0.1059                                                                         | 0.0678                                           |
| $wR_2(\text{All data})$                   | 0.1928                                                                            | 0.2022                                                                         | 0.1689                                           |

$${}^a R_1 = \frac{\sum ||F_o| - |F_c||}{\sum |F_o|}; \quad {}^b wR_2 = \left\{ \frac{\sum [w(F_o^2 - F_c^2)^2]}{\sum [w(F_o^2)^2]} \right\}^{1/2}$$

**Table S2.** Selected bond distances of **1**

|          |            |          |            |
|----------|------------|----------|------------|
| Dy1—O19  | 2.401 (19) | Ni1—O127 | 2.024 (18) |
| Dy1—O36  | 2.263 (18) | Sb1—O107 | 1.987 (19) |
| Dy1—O35  | 2.417 (17) | Sb1—O101 | 1.963 (15) |
| Dy1—O22  | 2.20(2)    | Sb1—O102 | 2.03 (2)   |
| Dy1—O103 | 2.30 (2)   | Sb2—O119 | 2.003 (18) |
| Dy1—O20  | 2.37 (3)   | Sb2—O53  | 1.979 (16) |
| Dy1—O21  | 2.37 (3)   | Sb2—O50  | 1.932 (17) |
| Dy2—O30  | 2.308 (18) | Sb3—O122 | 1.986 (17) |
| Dy2—O111 | 2.409 (19) | Sb3—O94  | 2.016 (16) |
| Dy2—O146 | 2.319 (16) | Sb3—O79  | 1.95 (2)   |
| Dy2—O110 | 2.431 (16) | W1—O69   | 1.744 (18) |
| Dy2—O62  | 2.413 (19) | W1—O34   | 1.98 (2)   |
| Dy2—O141 | 2.44 (2)   | W1—O110  | 1.98 (2)   |
| Dy2—O63  | 2.551 (19) | W1—O62   | 2.204 (17) |
| Dy2—O86  | 2.40 (2)   | W1—O108  | 1.736 (18) |
| Dy2—O31  | 2.591 (18) | W1—O63   | 2.091 (16) |
| Dy3—O48  | 2.431 (18) | W2—O111  | 1.98 (2)   |
| Dy3—O68  | 2.29 (2)   | W2—O113  | 1.695 (16) |
| Dy3—O139 | 2.40 (2)   | W2—O62   | 2.143 (18) |
| Dy3—O66  | 2.32 (2)   | W2—O65   | 1.771 (19) |
| Dy3—O65  | 2.199 (19) | W2—O31   | 2.38 (2)   |
| Dy3—O60  | 2.31 (2)   | W2—O22   | 1.79 (2)   |
| Dy3—O64  | 2.51 (3)   | W3—O111  | 2.10 (2)   |
| Dy3—O61  | 2.70 (3)   | W3—O112  | 1.729 (17) |
| Ni1—O69  | 2.05 (2)   | W3—O124  | 1.886 (19) |
| Ni1—O112 | 2.12 (2)   | W3—O110  | 1.972 (19) |
| Ni1—O113 | 2.058 (15) | W3—O141  | 2.148 (17) |
| Ni1—O114 | 2.04 (2)   | W3—O85   | 1.70 (2)   |
| Ni1—O59  | 1.98 (2)   |          |            |

**Table S3.** Selected bond distances of **2**



|          |          |          |          |
|----------|----------|----------|----------|
| Dy1—O102 | 2.46 (3) | Sb2—O88  | 1.99 (3) |
| Dy1—O96  | 2.64 (3) | Sb3—O116 | 2.00 (3) |
| Dy1—O51  | 2.42 (3) | Sb3—O117 | 1.99 (2) |
| Dy1—O50  | 2.43(2)  | Sb3—O109 | 2.04 (3) |
| Dy1—O103 | 2.49 (3) | Sb4—O74  | 2.09 (3) |
| Dy1—O5   | 2.56 (3) | Sb4—O77  | 1.97 (2) |
| Dy1—O6   | 2.35 (3) | Sb4—O72  | 2.10 (3) |
| Dy1—O111 | 2.37 (3) | Sb4—O78  | 2.02 (3) |
| Dy1—O49  | 2.17 (3) | Sb4—O75  | 2.00 (3) |
| Dy2—O87  | 2.46 (3) | Sb4—O79  | 1.95 (3) |
| Dy2—O32  | 2.40 (3) | W1—O102  | 2.08 (2) |
| Dy2—O36  | 2.41 (3) | W1—O51   | 1.95 (3) |
| Dy2—O94  | 2.14 (3) | W1—O142  | 1.73 (3) |
| Dy2—O160 | 2.30 (2) | W1—O75   | 1.81 (3) |
| Dy2—O34  | 2.46 (5) | W1—O5    | 2.16 (4) |
| Dy2—O35  | 2.53 (7) | W1—O25   | 1.96 (2) |
| Dy2—O33  | 2.40 (5) | W2—O96   | 2.13 (3) |
| Dy3—O143 | 2.35 (3) | W2—O97   | 1.87 (3) |
| Dy3—O90  | 2.36 (3) | W2—O51   | 2.00 (2) |
| Dy3—O99  | 2.42 (3) | W2—O50   | 2.15 (2) |
| Dy3—O56  | 2.35 (3) | W2—O77   | 1.81 (3) |
| Dy3—O91  | 2.37 (3) | W2—O52   | 1.81 (3) |
| Dy3—O76  | 2.16 (3) | W3—O102  | 1.94 (2) |
| Dy3—O89  | 2.41 (3) | W3—O50   | 2.03 (2) |
| Sb1—O81  | 1.93 (3) | W3—O74   | 1.83 (3) |
| Sb1—O83  | 1.98 (2) | W3—O76   | 1.79 (3) |
| Sb1—O82  | 1.96 (3) | W3—O94   | 1.90 (3) |
| Sb2—O105 | 1.96 (2) | W3—O103  | 2.24 (3) |
| Sb2—O23  | 2.02 (3) |          |          |

**Table S4.** Selected bond distances of **3**

|                      |            |                      |            |
|----------------------|------------|----------------------|------------|
| Ni1—O4 <sup>3</sup>  | 2.17 (3)   | W1—O4AA              | 1.86 (2)   |
| Ni1—O2W              | 2.09 (3)   | W1—O4AA <sup>2</sup> | 1.86 (2)   |
| Ni1—O2W <sup>1</sup> | 2.09 (3)   | W1—O2                | 1.981 (16) |
| Ni1—O1W              | 2.10 (4)   | W1—O2 <sup>2</sup>   | 1.981 (16) |
| Ni1—O18 <sup>1</sup> | 2.141 (19) | W4—O5                | 2.27 (2)   |
| Ni1—O18              | 2.141 (19) | W4—O3                | 1.766 (17) |
| Sb1—O5               | 1.98 (2)   | W4—O3 <sup>1</sup>   | 1.766 (17) |
| Sb1—O20 <sup>1</sup> | 2.020 (16) | W4—O6 <sup>1</sup>   | 2.071 (18) |
| Sb1—O20              | 2.020 (16) | W4—O6                | 2.071 (18) |
| W1—O3                | 2.091 (17) | W4—O4                | 1.74 (2)   |
| W1—O3 <sup>2</sup>   | 2.091 (17) |                      |            |

Symmetry transformations used to generate equivalent atoms: #1 +x, 1-y, +z; #2 +y, -x+1, 1-z; #3 1-y, -x+1, 1-z

**Table S5.** The valence state results of W atoms from {W<sub>3</sub>O<sub>11</sub>} unit, Sb, Dy and Ni for

compound **1** based on BVS.

|     | atoms | length (Å) | BVS   |
|-----|-------|------------|-------|
| W1  | O69   | 1.744      | 5.999 |
|     | O34   | 1.98       |       |
|     | O110  | 1.98       |       |
|     | O62   | 2.204      |       |
|     | O108  | 1.736      |       |
|     | O63   | 2.091      |       |
| W2  | O111  | 1.98       | 6.388 |
|     | O113  | 1.695      |       |
|     | O62   | 2.143      |       |
|     | O65   | 1.771      |       |
|     | O31   | 2.38       |       |
|     | O22   | 1.79       |       |
| W3  | O111  | 2.10       | 6.540 |
|     | O112  | 1.729      |       |
|     | O124  | 1.886      |       |
|     | O110  | 1.972      |       |
|     | O141  | 2.148      |       |
|     | O85   | 1.70       |       |
| Ni  | O69   | 2.05       | 2.097 |
|     | O112  | 2.12       |       |
|     | O113  | 2.058      |       |
|     | NO114 | 2.04       |       |
|     | O59   | 1.98       |       |
|     | O127  | 2.024      |       |
| Sb1 | O107  | 1.987      | 2.847 |
|     | O101  | 1.963      |       |
|     | O102  | 2.03       |       |
| Sb2 | O119  | 2.003      | 3.023 |

|     |      |       |       |
|-----|------|-------|-------|
|     | O53  | 1.979 |       |
|     | O50  | 1.932 |       |
| Sb3 | O122 | 1.986 | 2.920 |
|     | O94  | 2.016 |       |
|     | O79  | 1.95  |       |
| Dy1 | O19  | 2.401 | 2.924 |
|     | O36  | 2.263 |       |
|     | O35  | 2.417 |       |
|     | O22  | 2.20  |       |
|     | O103 | 2.30  |       |
|     | O20  | 2.37  |       |
|     | O21  | 2.37  |       |
| Dy2 | O30  | 2.308 | 2.901 |
|     | O111 | 2.409 |       |
|     | O146 | 2.319 |       |
|     | O110 | 2.431 |       |
|     | O62  | 2.413 |       |
|     | O141 | 2.44  |       |
|     | O63  | 2.551 |       |
|     | O86  | 2.40  |       |
|     | O31  | 2.591 |       |
| Dy3 | O48  | 2.431 | 2.956 |
|     | O68  | 2.29  |       |
|     | O139 | 2.40  |       |
|     | O66  | 2.32  |       |
|     | O65  | 2.199 |       |
|     | O60  | 2.31  |       |
|     | O64  | 2.51  |       |
|     | O61  | 2.70  |       |

**Table S6.** The valence state results of W atoms from  $\{W_3O_{11}\}$  unit, Sb and Dy for compound **2** based on BVS.

| atoms |      | length (Å) | BVS   |
|-------|------|------------|-------|
| W1    | O102 | 2.08       | 5.960 |
|       | O51  | 1.95       |       |
|       | O142 | 1.73       |       |
|       | O75  | 1.81       |       |
|       | O5   | 2.16       |       |
|       | O25  | 1.96       |       |
| W2    | O96  | 2.13       | 5.700 |
|       | O97  | 1.87       |       |
|       | O51  | 2.00       |       |
|       | O50  | 2.15       |       |
|       | O77  | 1.81       |       |
|       | O52  | 1.81       |       |
| W3    | O111 | 2.10       | 6.555 |
|       | O112 | 1.729      |       |
|       | O124 | 1.886      |       |
|       | O110 | 1.972      |       |
|       | O141 | 2.148      |       |
|       | O85  | 1.70       |       |
| Sb4   | O74  | 2.09       | 4.893 |
|       | O77  | 1.97       |       |
|       | O72  | 2.10       |       |
|       | O78  | 2.02       |       |
|       | O75  | 2.00       |       |
|       | O79  | 1.95       |       |
| Sb1   | O81  | 1.93       | 3.140 |
|       | O83  | 1.98       |       |
|       | O82  | 1.96       |       |

|     |       |      |       |
|-----|-------|------|-------|
| Sb2 | O105  | 1.96 | 2.872 |
|     | O23   | 2.02 |       |
|     | O88   | 1.99 |       |
| Sb3 | O116  | 2.00 | 2.719 |
|     | O117  | 1.99 |       |
|     | SO109 | 2.04 |       |
| Dy1 | O102  | 2.46 | 2.982 |
|     | O96   | 2.64 |       |
|     | O51   | 2.42 |       |
|     | O50   | 2.43 |       |
|     | O103  | 2.49 |       |
|     | O5    | 2.56 |       |
|     | O6    | 2.35 |       |
|     | O111  | 2.37 |       |
|     | O49   | 2.17 |       |
| Dy2 | O87   | 2.46 | 2.962 |
|     | O32   | 2.40 |       |
|     | O36   | 2.41 |       |
|     | O94   | 2.14 |       |
|     | O160  | 2.30 |       |
|     | O34   | 2.46 |       |
|     | O35   | 2.53 |       |
|     | O33   | 2.40 |       |
| Dy3 | O143  | 2.35 | 2.831 |
|     | O90   | 2.36 |       |
|     | O99   | 2.42 |       |
|     | O56   | 2.35 |       |
|     | O91   | 2.37 |       |
|     | O76   | 2.16 |       |
|     | O89   | 2.41 |       |

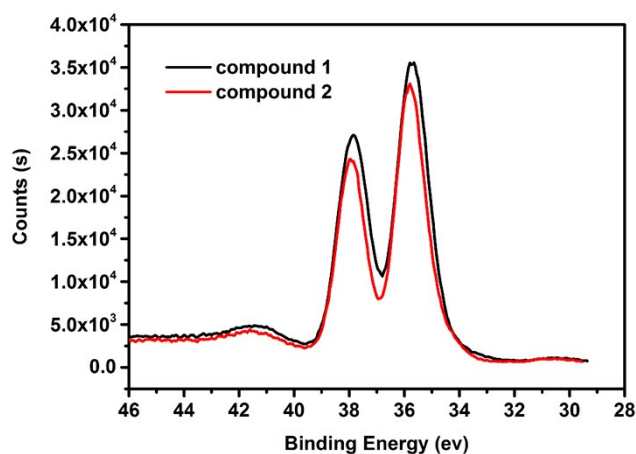

**Fig. S4.** The XPS spectra of W atoms for compounds **1** and **2**.

As shown in Figure S4, the XPS results of W atoms for **1** and **2** exhibit similar behaviors. The peaks around 37.85 and 35.65 eV for **1** and around 37.95 and 35.80 eV for **2** correspond to the W  $4f_{5/2}$  and W  $4f_{7/2}$  of the  $W^{6+}$  centers.<sup>1</sup>

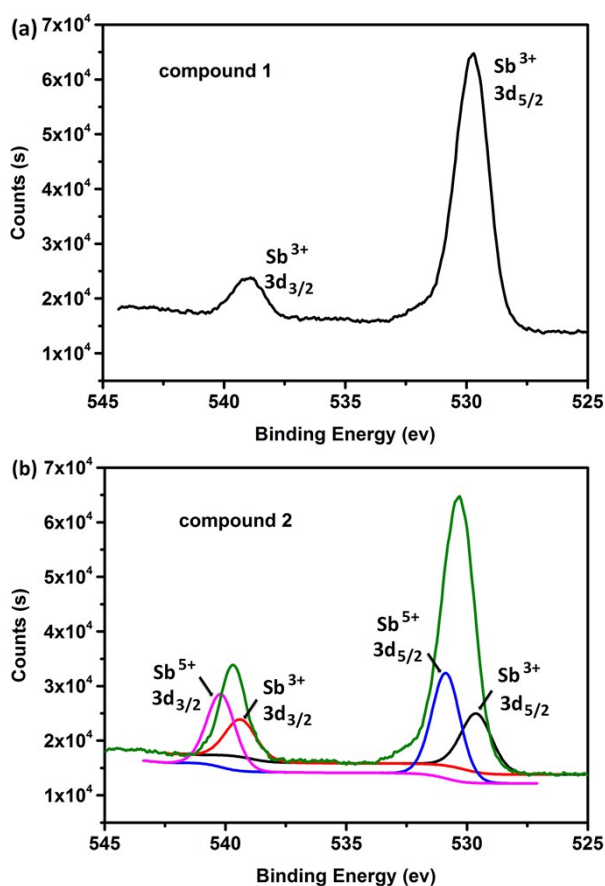

**Fig. S5.** The XPS spectra of Sb atoms for compounds **1** and **2**.

As shown in Figure S4a, the signals at 529.7 and 538.9 eV for **1** are ascribed to the  $\text{Sb } 3d_{5/2}$  and  $\text{Sb } 3d_{3/2}$  of the  $\text{Sb}^{3+}$  cations. As for **2**, both the  $\text{Sb } 3d_{3/2}$  and  $\text{Sb } 3d_{5/2}$  spectra can be divided into two characteristic peaks. And four deconvoluted peaks were observed in the  $\text{Sb } 3d$  region at 540.2, 530.9, 539.4 and 529.65 eV, confirming the  $\text{Sb}$  valence states as  $\text{Sb}^{5+}$  and  $\text{Sb}^{3+}$ .<sup>2</sup>



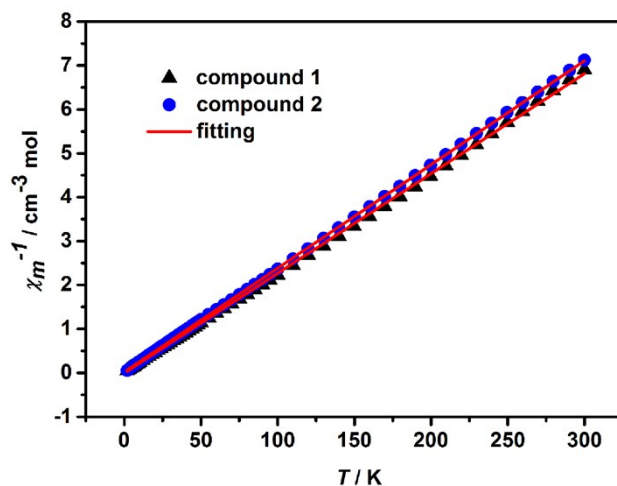

**Fig. S6.** Plots of  $1/\chi_m$  vs.  $T$  to a Curie-Weiss law for compounds **1** and **2** in the range of 2-300 K.

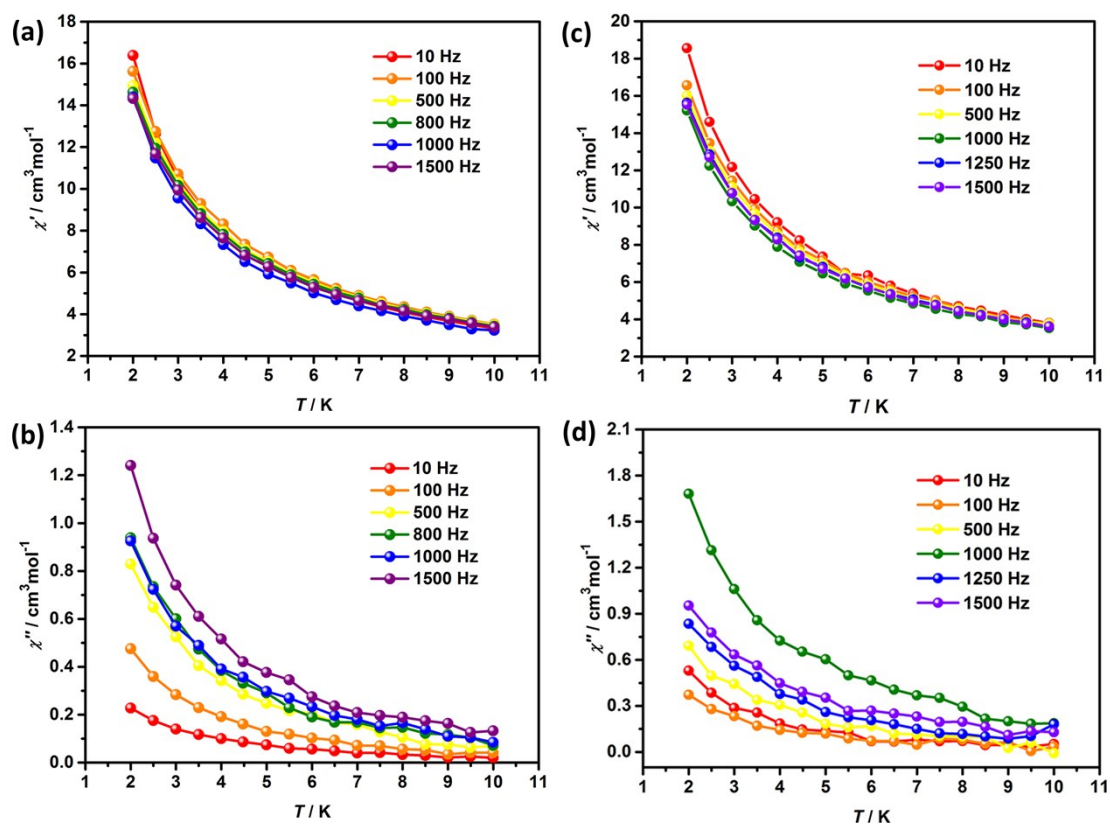

**Fig. S7.** Temperature dependence of in-phase ( $\chi'$ ) (a), (c) and out-of-phase ( $\chi''$ ) (b), (d) of ac susceptibility signals at different frequencies under a zero dc field for **1** and **2**.

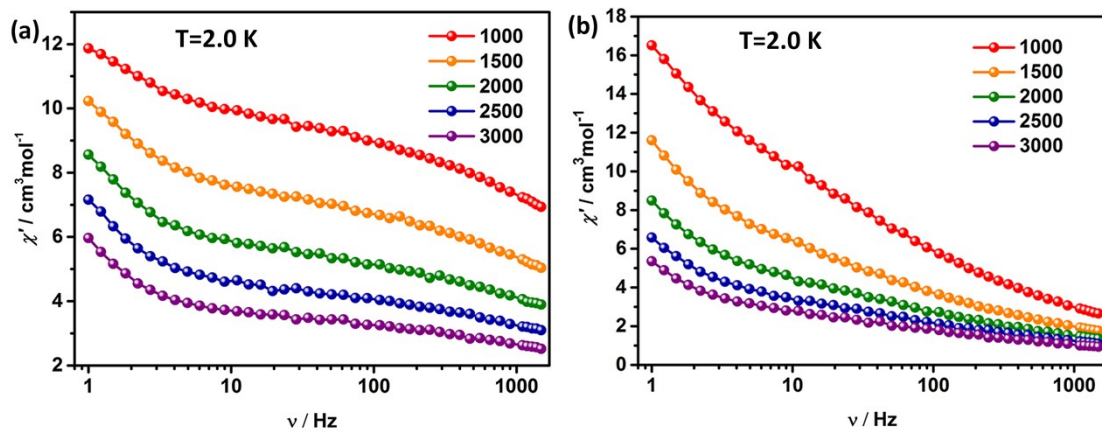

**Fig. S8.** Field dependence of in-phase ( $\chi'$ ) of ac susceptibility signals at 2 K for **1** (a) and **2** (b).

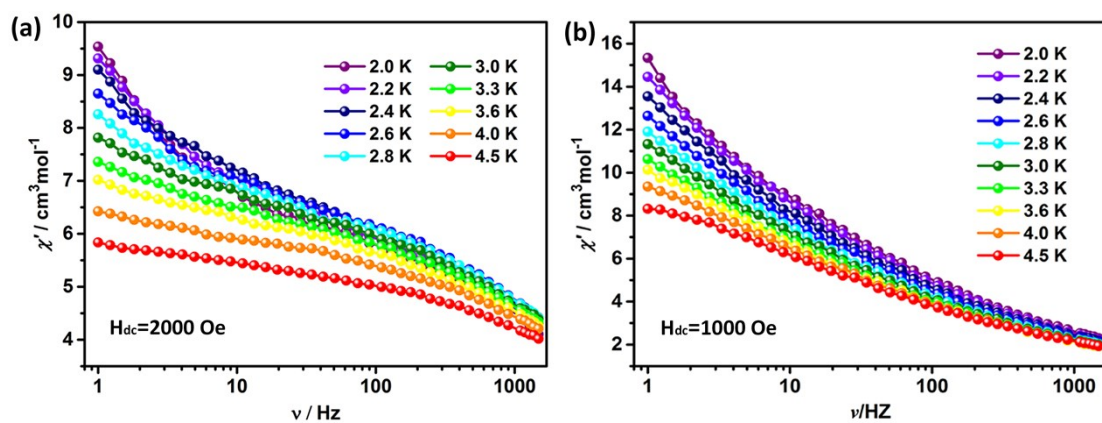

**Fig. S9.** Temperature dependence of in-phase ( $\chi'$ ) of ac susceptibility signals at 2 K for **1** (a) and **2** (b).

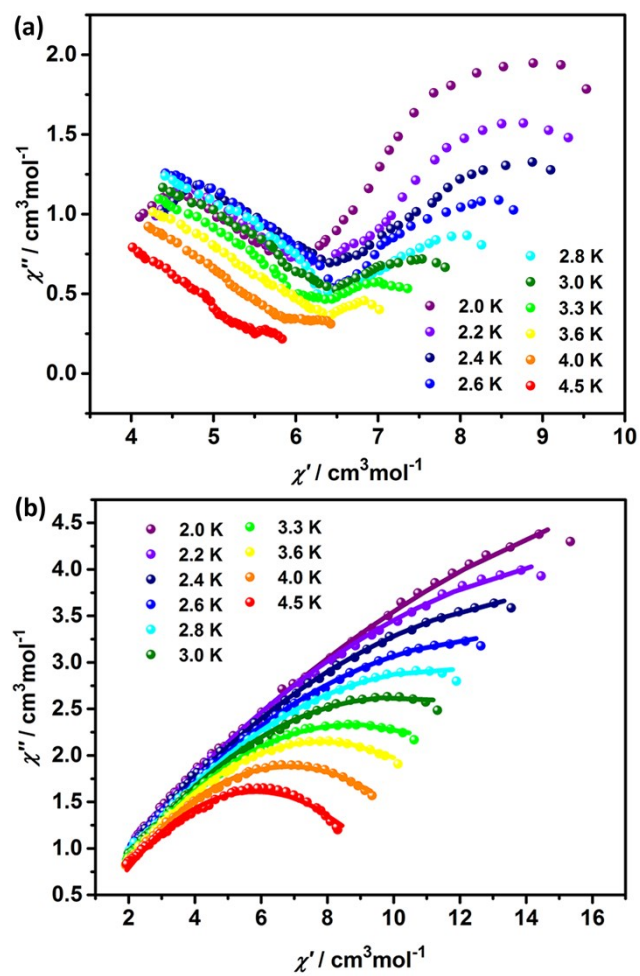

**Fig. S10.** Cole-Cole diagrams of **1** (a) and **2** (b) with the solid lines represent the best fits to the experimental data.

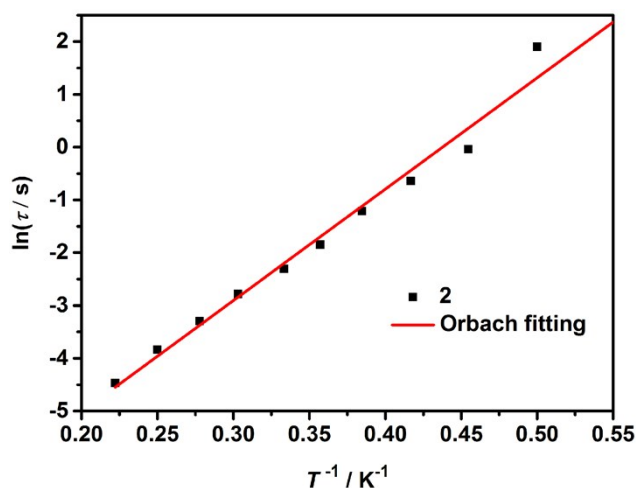

**Fig. S11.** Plots of  $\ln(\tau)$  versus  $T^{-1}$  for **2** fitted by the generalized Debye model for a one-relaxation process.

**Table S7.** Best fitted parameters of the Cole-Cole plots for **2**.

| Temperature | $\chi_T$ | $\chi_S$ | $\tau$  | $\alpha$ |
|-------------|----------|----------|---------|----------|
| 2.0         | 55.28092 | -0.76679 | 6.70733 | 0.7485   |
| 2.2         | 38.58582 | -0.39122 | 0.9593  | 0.72029  |
| 2.4         | 32.79391 | -0.25704 | 0.52695 | 0.71194  |
| 2.6         | 27.81003 | -0.14482 | 0.29797 | 0.70434  |
| 2.8         | 23.45952 | 0.07014  | 0.15772 | 0.68601  |
| 3.0         | 20.57123 | 0.16644  | 0.09979 | 0.67653  |
| 3.3         | 17.76428 | 0.25563  | 0.06196 | 0.6666   |
| 3.6         | 15.48172 | 0.44067  | 0.03709 | 0.64436  |
| 4.0         | 13.36129 | 0.48576  | 0.02163 | 0.63773  |
| 4.5         | 11.1166  | 0.57024  | 0.01145 | 0.62262  |

**Table S8.** The energy barriers for this work and the previously reported Dy-containing POM-based SMMs.

| Compound                                                                                                                                                      | $U_{\text{eff}}/k_{\text{B}}$ (K) | ref       |
|---------------------------------------------------------------------------------------------------------------------------------------------------------------|-----------------------------------|-----------|
| $[\text{Dy}(\text{H}_2\text{O})(\text{Hpic})_3][\text{Dy}(\text{Hpic})_2(\alpha\text{-P}_2\text{W}_{17}\text{O}_{61})]^{4-}$                                  | 119.38                            | 3         |
| $[\text{N}(\text{CH}_3)_4]_5\text{H}_4[\text{Dy}(\alpha\text{-PW}_{11}\text{O}_{39})_2]^{2-}$                                                                 | 55                                | 4         |
| $[\text{N}(\text{CH}_3)_4]_4\text{H}_2[\{\text{Dy}(\alpha\text{-PW}_{11}\text{O}_{39})(\text{H}_2\text{O})_3\}_2]^{2-}$                                       | 57                                |           |
| $[(\text{DyOH}_2)_3(\text{CO}_3)(\alpha\text{-PW}_9\text{O}_{34})_2]^{11-}$                                                                                   | 37                                |           |
| $[\text{Dy}_8(\text{PW}_{10}\text{O}_{38})_4(\text{OH})_4(\text{H}_2\text{O})_2(\text{W}_3\text{O}_{14})]^{26-}$                                              | 64                                |           |
| $\{\text{Dy}[\text{Mo}_5\text{O}_{13}(\text{OMe})_4(\text{NO})_2]_2\}^{3-}$                                                                                   | 50                                | 5         |
| $[\text{Dy}_9(\text{CO}_3)_3(\text{ampH})_2(\text{H}_2\text{O})_{12}(\text{PW}_{10}\text{O}_{37})_6]^{35-}$                                                   | 56                                | 6         |
| $[(\text{PW}_{11}\text{O}_{39})_2\text{Dy}_2(\text{OH})_2(\text{H}_2\text{O})_2]^{10-}$                                                                       | 141                               | 7         |
| $[(\text{PW}_{11}\text{O}_{39})_2\text{Dy}_2\text{F}_2(\text{H}_2\text{O})_2]^{10-}$                                                                          | 106                               |           |
| $[\{(\text{AsW}_9\text{O}_{33})_3\text{Dy}_2(\text{H}_2\text{O})_4\text{W}_4\text{O}_9(\text{H}_2\text{O})\}_2(\text{NH}_2(\text{CH}_2\text{PO}_3)_2)]^{33-}$ | 99                                | 8         |
| $\{[\text{Dy}_4\text{As}_5\text{W}_{40}\text{O}_{144}(\text{H}_2\text{O})_{10}(\text{gly})_2]_3\}^{21-}$                                                      | 3.9                               | 9         |
| $[\text{Dy}(\mu_2\text{-OH})_2\text{Eu}(\gamma\text{-SiW}_{10}\text{O}_{36})_2]^{12-}$                                                                        | 73                                | 10        |
| $[\text{K} \subset \{(\text{AsW}_9\text{O}_{33})\text{Dy}(\text{H}_2\text{O})_2\}_6]^{35-}$                                                                   | 69                                | 11        |
| $[\text{Dy}_2(\mu_2\text{-OH})_2(\gamma\text{-SiW}_{10}\text{O}_{36})_2]^{12-}$                                                                               | 66                                | 12        |
| $[\text{Dy}_4(\text{Sb}_3\text{O}_2)_2(\text{SbW}_{10}\text{O}_{37})_2(\text{SbW}_8\text{O}_{31})_2(\text{H}_2\text{O})_6]^{18-}$                             | 58.2                              | 13        |
| $[\text{Dy}_3(\text{H}_2\text{O})_6\text{Sb}^{\text{V}}(\text{H}_2\text{O})(\text{W}_3\text{O}_{11})(\text{B-}\alpha\text{-SbW}_9\text{O}_{33})]^{17-}$       | 20.1                              | This work |

## References

- 1 J.-C. Liu, J.-W. Zhao and Y.-F. Song, 1-D Chain Tungstotellurate Hybrids Constructed from OrganicLigand-Connecting Iron-Lanthanide Heterometal Encapsulated Tetrameric Polyoxotungstate Units. *Inorg. Chem.* 2019, **58**, 9706-9712.
- 2 Y. Wang, J. Lu, X. Ma, Y. Niu, V. Singh, P. Ma, C. Zhang, J. Niu and J. Wang, Synthesis, characterization and catalytic oxidation of organosilanes with a novel multilayer polyoxomolybdate containing mixed-valence antimony. *Mol Catal.* 2018, **452**, 167-174.
- 3 X. Wang, Y. Liu, M. Jin, Y. Wu, L. Chen and J.-W. Zhao, Two Families of Rare-Earth-Substituted Dawson-type Monomeric and Dimeric Phosphotungstates Functionalized by Carboxylic Ligands. *Cryst. Growth Des.* 2017, **17**, 5295-5308.
- 4 P. Ma, F. Hu, D. Zhang, C. Zhang, J. Niu and J. Wang, Magnetoluminescent Bifunctional Dysprosium-Based Phosphotungstates with Synthesis and Correlations between Structures and Properties. *Cryst. Growth Des.* 2017, **17**, 4, 1947–1956.
- 5 S. She, C. Gao, K. Chen, A. Bayaguud, Y. Huang, B.-W. Wang, S. Gao and Y. Wei, A Series of Weakley-type Polyoxomolybdates: Synthesis, Characterization, and Magnetic Properties by a Combined Experimental and Theoretical Approach. *Inorg. Chem.* 2018, **57**, 963-969.
- 6 Y. Huo, Y.-C. Chen, S.-G. Wu, J.-H. Jia, W.-B. Chen, J.-L. Liu and M.-L. Tong, pH-Controlled Assembly of Organophosphonate-Bridged Dysprosium(III) Single-Molecule Magnets Based on Polyoxometalates. *Inorg. Chem.* 2018, **57**, 6773-6777.
- 7 Y. Huo, Y.-C. Chen, S.-G. Wu, J.-L. Liu, J.-H. Jia, W.-B. Chen, B.-L. Wang, Y.-Q. Zhang and M.-L. Tong, Effect of Bridging Ligands on Magnetic Behavior in Dinuclear Dysprosium Cores Supported by Polyoxometalates. *Inorg. Chem.* 2019, **58**, 1301-1308.

- 8 Y. Huo, R. Wan, P. Ma, J. Liu, Y. Chen, D. Li, J. Niu, J. Wang and M.-L. Tong, Organophosphonate-Bridged Polyoxometalate-Based Dysprosium(III) Single-Molecule Magnet. *Inorg. Chem.* 2017, **56**, 12687-12691.
- 9 C. Ritchie, M. Speldrich, R. W. Gable, L. Sorace, P. Kögerler and C. Boskovic, Utilizing the Adaptive Polyoxometalate  $[\text{As}_2\text{W}_{19}\text{O}_{67}(\text{H}_2\text{O})]^{14-}$  To Support a Polynuclear Lanthanoid-Based Single-Molecule Magnet. *Inorg. Chem.* 2011, **50**, 7004-7014.
- 10 R. Sato, K. Suzuki, M. Sugawa and N. Mizuno, Heterodinuclear Lanthanoid-Containing Polyoxometalates: Stepwise Synthesis and Single-Molecule Magnet Behavior. *Chem. Eur. J.* 2013, **19**, 12982-12990.
- 11 Y. Huo, Y.-C. Chen, J.-L. Liu, J.-H. Jia, W.-B. Chen, S.-G. Wu and M.-L. Tong, A wheel-shaped Dy(III) single-molecule magnet supported by polyoxotungstates. *Dalton Trans.* 2017, **46**, 16796-16801.
- 12 K. Suzuki, R. Sato and N. Mizuno, Reversible switching of single-molecule magnet behaviors by transformation of dinuclear dysprosium cores in polyoxometalates. *Chem. Sci.* 2013, **4**, 596-600.
- 13 J. Cai, R. Ye, K. Jia, X. Qiao, L. Zhao, J. Liu and W. Sun, pH-controlled construction of lanthanide clusters from lacunary polyoxometalate with single-molecule magnet behavior. *Inorg. Chem. Commun.*, 2020, **112**, 107694.
